# Supplementary material for: Associations between Erectile Dysfunction and Vascular Parameters: A Systematic Review and Meta-Analysis
Source: PubMed Central journal article supplement — World J Mens Health. 2024 Jan 15;42(4):712–26. doi: 10.5534/wjmh.230192 (PMC11439810; doi:10.5534/wjmh.230192), 2024-01-15
Supplement: wjmh-42-712-s002.pdf [file wjmh-42-712-s002.pdf]

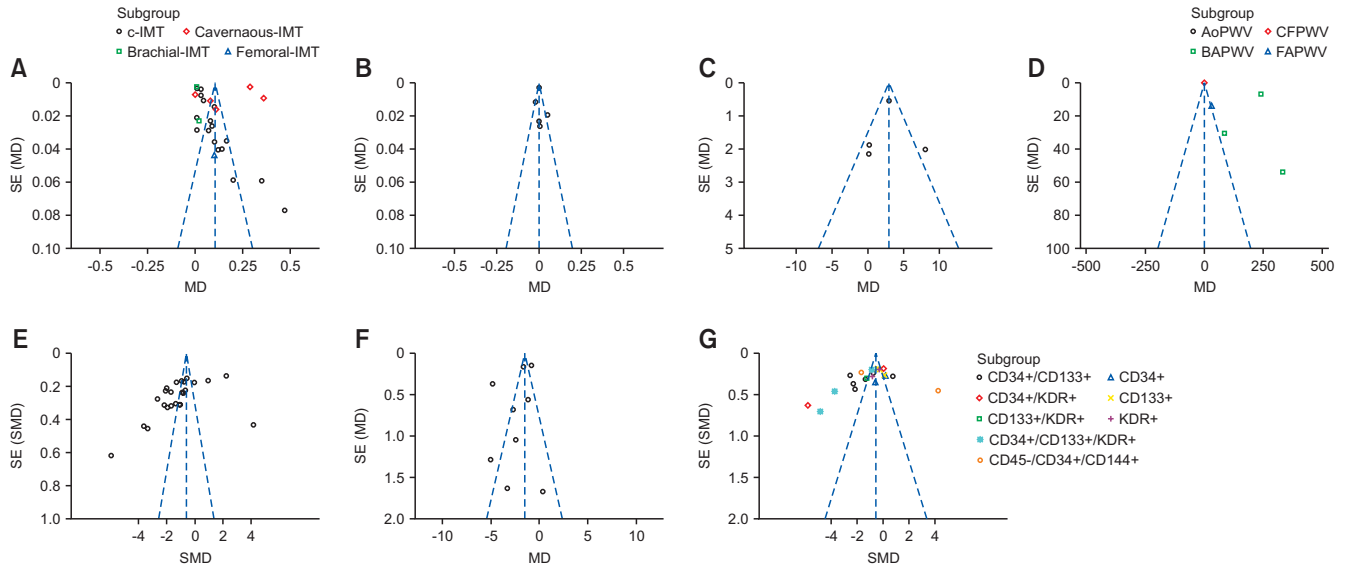

**Supplement Fig. 2.** Funnel plots of the meta-analysis between erectile dysfunction (ED) and IMT (A), ABI (B), AI (C), PWV (D), FMD (E), NMD (F), and EPC (G). ABI: ankle-brachial index, AI: augmentation index, PWV: pulse wave velocity, FMD: flow-mediated dilation, NMD: nitrate-mediated dilation, EPC: endothelial progenitor cell.
