# Supplementary material for: Associations between Erectile Dysfunction and Vascular Parameters: A Systematic Review and Meta-Analysis
Source: PubMed Central journal article supplement — World J Mens Health. 2024 Jan 15;42(4):712–26. doi: 10.5534/wjmh.230192 (PMC11439810; doi:10.5534/wjmh.230192), 2024-01-15
Supplement: wjmh-42-712-s006.pdf [file wjmh-42-712-s006.pdf]

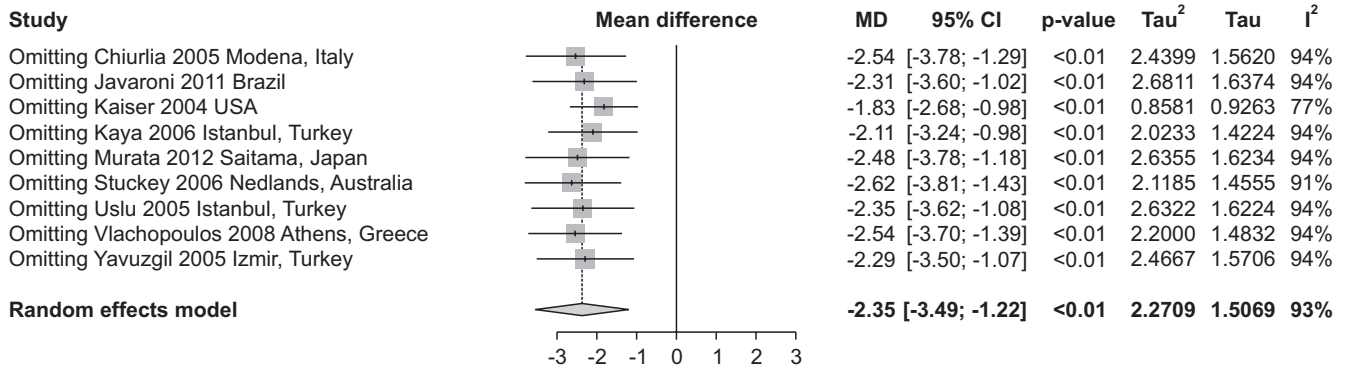

**Supplement Fig. 6.** Sensitivity analysis of studies on the relationship between erectile dysfunction and nitrate-mediated dilation. CI: confidence interval.
