# Supplementary material for: Associations between Erectile Dysfunction and Vascular Parameters: A Systematic Review and Meta-Analysis
Source: PubMed Central journal article supplement — World J Mens Health. 2024 Jan 15;42(4):712–26. doi: 10.5534/wjmh.230192 (PMC11439810; doi:10.5534/wjmh.230192), 2024-01-15
Supplement: wjmh-42-712-s007.pdf [file wjmh-42-712-s007.pdf]

**Supplement Table 1.** The Boolean formula in searching PubMed, Web of Science, and Scopus

---

|                |                                                                                                                                                                                                                                                                                                                                                                                                                                                                                                                                                                                                                                                                           |
|----------------|---------------------------------------------------------------------------------------------------------------------------------------------------------------------------------------------------------------------------------------------------------------------------------------------------------------------------------------------------------------------------------------------------------------------------------------------------------------------------------------------------------------------------------------------------------------------------------------------------------------------------------------------------------------------------|
| PubMed         | ((Pulse Wave Velocity) OR (PWV) OR (intima-media thickness) OR (cIMT) OR (Arterial Intima-media Thickness) OR (ABI) OR (ankle-brachial index) OR (cAIx) OR (Central Aortic Reflective Wave Pressure Augmentation Index) OR (FMD) OR (flow-mediated dilation) OR (reactive hyperemia index) OR (RHI) OR (augmentation index) OR (foveal avascular zone) OR (FAZ) OR (Endothelial microparticles) OR (EMP) OR (EPC) OR (Endothelial Progenitor Cells)) AND ((erectile dysfunction) OR (IIEF) OR (International Index of Erectile Function) OR (Brief Male Sexual Function Inventory) OR (BSFI) OR (Danish Prostatic Symptom Score) OR (DAN-PSS-sex) OR (Epstein Inventory)) |
| Scopus         |                                                                                                                                                                                                                                                                                                                                                                                                                                                                                                                                                                                                                                                                           |
| Web of Science |                                                                                                                                                                                                                                                                                                                                                                                                                                                                                                                                                                                                                                                                           |

---
