# Supplementary material for: Associations between Erectile Dysfunction and Vascular Parameters: A Systematic Review and Meta-Analysis
Source: PubMed Central journal article supplement — World J Mens Health. 2024 Jan 15;42(4):712–26. doi: 10.5534/wjmh.230192 (PMC11439810; doi:10.5534/wjmh.230192), 2024-01-15
Supplement: wjmh-42-712-s008.pdf [file wjmh-42-712-s008.pdf]

**Supplement Table 2.** Description of outcome measures

| Outcome                                                       | Description                                                                                                                                                                                                                                                                      | Reference value                                                                                                                                                                                                                          |
|---------------------------------------------------------------|----------------------------------------------------------------------------------------------------------------------------------------------------------------------------------------------------------------------------------------------------------------------------------|------------------------------------------------------------------------------------------------------------------------------------------------------------------------------------------------------------------------------------------|
| Intima-media thickness (IMT)                                  | The IMT is measured by ultrasonography for the carotid artery (cIMT), cavernous artery (cavernous IMT), brachial artery (brachial IMT), and femoral artery (femoral IMT).                                                                                                        | IMT <0.9 mm is considered normal, while the range of 0.9–1.2 mm is defined as increased thickness and mean IMT ≥1.3 mm is defined as plaque [1].                                                                                         |
| Pulse wave velocity (PWV)                                     | PWV is a gold standard for assessing arterial stiffness by measuring the arteries at the corresponding sites [2].                                                                                                                                                                | It has a normal value that is positively correlated with age and blood pressure [3].                                                                                                                                                     |
| Ankle-brachial index (ABI)                                    | The ABI is the ratio of ankle systolic pressure to arm systolic pressure, which was proposed as a test for peripheral artery disease as early as 1950 [4].                                                                                                                       | Although the lower limit of normal ABI is still controversial, some studies have proposed a borderline range of 0.90–0.99. Below this range, low ABI is associated with increased incidence and mortality of cardiovascular disease [5]. |
| Augmentation index (AI)                                       | AI, equals to the ratio of augmented pressure to pulse pressure, is an important indicator of increased elastic artery stiffness [6].                                                                                                                                            | The normal range of AI is considered to be less than 3% in the general population [7].                                                                                                                                                   |
| Nitrate-mediated dilation (NMD), flow-mediated dilation (FMD) | FMD and NMD are common measures used to assess endothelial function by examining brachial artery at rest and during reactive hyperemia, providing information about endothelium-dependent vasodilatation, whereas sublingual nitro-glycerin is administered to evaluate NMD [8]. | Heiss et al [9] proposed a cutoff value of 6.5% for normal FMD through a meta-analysis of 1, 579 subjects. The normal range for NMD is >11.9% [10].                                                                                      |
| Endothelial progenitor cells (EPCs)                           | EPCs are gaining interest as biomarkers of endothelial function due to their noninvasive characteristics [11].                                                                                                                                                                   | The lack of standardization of EPC limited their routine clinical use, leading to no consensus reference values [11].                                                                                                                    |

## REFERENCES

1. Furberg CD, Byington RP, Borhani NA. Multicenter isradipine diuretic atherosclerosis study (MIDAS). Design features. The Midas Research Group. *Am J Med* 1989;86(4A):37-9.
2. Shigemura K, Arakawa S, Kamidono S, Nakano Y, Fujisawa M. Effect of sildenafil on arterial stiffness, as assessed by pulse wave velocity, in patients with erectile dysfunction. *Int J Urol* 2006;13:956-9.
3. Reference Values for Arterial Stiffness' Collaboration. Determinants of pulse wave velocity in healthy people and in the presence of cardiovascular risk factors: 'establishing normal and reference values'. *Eur Heart J* 2010;31:2338-50.
4. Criqui MH, Aboyans V. Epidemiology of peripheral artery disease. *Circ Res* 2015;116:1509-26. Erratum in: *Circ Res* 2015;117:e12.
5. Peltonen E, Laivuori M, Vakhitov D, Korhonen P, Venermo M, Hakovirta H. The cardiovascular-mortality-based estimate for normal range of the Ankle-Brachial Index (ABI). *J Cardiovasc Dev Dis* 2022;9:147.
6. Nichols WW, Singh BM. Augmentation index as a measure of peripheral vascular disease state. *Curr Opin Cardiol* 2002;17:543-51.
7. Shoskes DA, Tucky B, Polackwich AS. Improvement of endothelial function following initiation of testosterone replacement therapy. *Transl Androl Urol* 2016;5:819-23.
8. Kizhakekuttu TJ, Gutterman DD, Phillips SA, Jurva JW, Arthur EI, Das E, et al. Measuring FMD in the brachial artery: how important is QRS gating? *J Appl Physiol* (1985) 2010;109:959-65.
9. Heiss C, Rodriguez-Mateos A, Bapir M, Skene SS, Sies H, Kelm M. Flow-mediated dilation reference values for evaluation of endothelial function and cardiovascular health. *Cardiovasc Res* 2023;119:283-93.
10. Hamilton SJ, Chew GT, Davis TM, Watts GF. Prevalence and predictors of abnormal arterial function in statin-treated type 2 diabetes mellitus patients. *Metabolism* 2012;61:349-57.
11. La Vignera S, Condorelli R, Vicari E, D'Agata R, Calogero AE. Arterial erectile dysfunction: reliability of new markers of endothelial dysfunction. *J Endocrinol Invest* 2011;34:e314-20.
