# Supplementary material for: Associations between Erectile Dysfunction and Vascular Parameters: A Systematic Review and Meta-Analysis
Source: PubMed Central journal article supplement — World J Mens Health. 2024 Jan 15;42(4):712–26. doi: 10.5534/wjmh.230192 (PMC11439810; doi:10.5534/wjmh.230192), 2024-01-15
Supplement: wjmh-42-712-s009.pdf [file wjmh-42-712-s009.pdf]

**Supplement Table 3.** The baseline characteristics of studies included in the meta-analysis

| First author  | Publication year | Population                                                                                               | Age range (average) | Measures                                                                                                                                                                                                                                                                                               | ED assessment |
|---------------|------------------|----------------------------------------------------------------------------------------------------------|---------------------|--------------------------------------------------------------------------------------------------------------------------------------------------------------------------------------------------------------------------------------------------------------------------------------------------------|---------------|
| Al-Ali        | 2015             | 41 men with ED, 18 men without ED                                                                        | (66.4, 60.2)        | cIMT                                                                                                                                                                                                                                                                                                   | IIEF-5        |
| Arrabal-Polo  | 2014             | 44 men with ED, 20 men without ED                                                                        | (54.2, 52.4)        | cIMT                                                                                                                                                                                                                                                                                                   | IIEF-5        |
| Averbeck      | 2012             | 34 men with ED, 18 age-matched men without ED                                                            | (59.61, 56.18)      | FMD                                                                                                                                                                                                                                                                                                    | IIEF-5        |
| Baumhäkel     | 2006             | 71 coronary artery disease patients with ED, 48 coronary artery disease patients without ED              | (64.1)              | EPCs (CD133 <sup>+</sup> );<br>EPCs (CD34 <sup>+</sup> /KDR <sup>+</sup> )                                                                                                                                                                                                                             | KEED          |
| Bhatia        | 2013             | 225 patients undergoing coronary angiography (163 had ED, 62 had no ED)                                  | (60.4, 56.4)        | FMD                                                                                                                                                                                                                                                                                                    | IIEF-5        |
| Bocchio       | 2004             | 45 only with ED, 25 without ED                                                                           | 25–67 (44.6, 45.9)  | cIMT                                                                                                                                                                                                                                                                                                   | IIEF-15       |
| Bulbul        | 2022             | 74 men with ED, 86 age-matched men without ED                                                            | (59.8, 57.9)        | ABI                                                                                                                                                                                                                                                                                                    | IIEF-5        |
| Caretta       | 2009             | 84 men with ED, 25 men without ED                                                                        | (52.5, 47.5)        | IMT cavernous                                                                                                                                                                                                                                                                                          | IIEF-15       |
| Caretta       | 2013             | 77 male heart transplanted patients (50 had ED, 27 had no ED)                                            | (64, 57.6)          | IMT cavernous                                                                                                                                                                                                                                                                                          | IIEF-5        |
| Chen          | 2016             | 261 men with ED, 40 men without ED                                                                       | 19–40               | cIMT; FMD                                                                                                                                                                                                                                                                                              | IIEF-5        |
| Chiurlia      | 2005             | 70 men with ED, 73 age-matched men without ED                                                            | (50.9, 50.1)        | FMD; NMD                                                                                                                                                                                                                                                                                               | IIEF-5        |
| Dženkevičiūtė | 2013             | 45 caucasian men who were sexually active in a marriage or stable relationship (21 had ED, 24 had no ED) | (46.80, 48.2)       | cIMT; AI                                                                                                                                                                                                                                                                                               | IIEF-15       |
| Elkamshoushi  | 2018             | 15 men with ED, 15 men without ED                                                                        | 30–45               | cIMT                                                                                                                                                                                                                                                                                                   | IIEF-5        |
| Esposito      | 2007             | 30 type 2 diabetic patients with ED, 20 healthy men                                                      | (57.2, 53.9)        | FMD                                                                                                                                                                                                                                                                                                    | IIEF-5        |
| Esposito      | 2008             | 30 diabetic patients with ED, 20 nondiabetic men without ED                                              | (56.3, 55.1)        | FMD                                                                                                                                                                                                                                                                                                    | IIEF-5        |
| Esposito      | 2009             | 30 overweight ED patients, 30 age- and weight- matched persons without ED                                | (46.1, 47.5)        | FMD; EPCs (CD34 <sup>+</sup> ); EPCs(CD133 <sup>+</sup> );<br>EPCs(KDR <sup>+</sup> ); EPCs(CD34 <sup>+</sup> /CD133 <sup>+</sup> );<br>EPCs(CD34 <sup>+</sup> /KDR <sup>+</sup> );<br>EPCs(CD133 <sup>+</sup> /KDR <sup>+</sup> );<br>EPCs(CD34 <sup>+</sup> /CD133 <sup>+</sup> / KDR <sup>+</sup> ) | IIEF-5        |
| Foresta       | 2005             | 28 patients with ED, 22 subjects without ED                                                              | (45.3, 44.8)        | EPCs(CD34 <sup>+</sup> /CD133 <sup>+</sup> )                                                                                                                                                                                                                                                           | IIEF-5        |
| Foresta       | 2006             | 26 patients with ED, 23 subjects without ED                                                              | (50.1, 47.6)        | EPCs(CD34 <sup>+</sup> /CD133 <sup>+</sup> )                                                                                                                                                                                                                                                           | IIEF-5        |
| Foresta       | 2006             | 68 men with ED, 25 age-matched men without ED                                                            | (52.8, 52.5)        | FMD; EPCs(CD34 <sup>+</sup> /CD133 <sup>+</sup> )                                                                                                                                                                                                                                                      | IIEF-5        |
| Foresta       | 2009             | 20 patients with ED, 15 subjects without ED                                                              | (47, 45)            | EPCs(CD34 <sup>+</sup> ); EPCs(CD34 <sup>+</sup> /CD133 <sup>+</sup> );<br>EPCs(CD34 <sup>+</sup> /CD133 <sup>+</sup> / KDR <sup>+</sup> )                                                                                                                                                             | IIEF-15       |
| Gerber        | 2015             | 122 patients had moderate to severe ED, 277 persons had no or mild ED                                    | (61.7, 53.5)        | FMD                                                                                                                                                                                                                                                                                                    | IIEF-5        |
| Guaraldi      | 2012             | 133 HIV-infected patients (79 had ED, 54 had no ED)                                                      | (50.06, 47.48)      | FMD                                                                                                                                                                                                                                                                                                    | IIEF-15       |
| Huang         | 2010             | 52 men with ED, 22 men without ED                                                                        | (29.4, 27.9)        | cIMT; FMD                                                                                                                                                                                                                                                                                              | IIEF-5        |
| Imai          | 2009             | 95 subjects with ED, 64 subjects without ED                                                              | (67, 54)            | BAPWV                                                                                                                                                                                                                                                                                                  | IIEF-5        |
| Ioakeimidis   | 2016             | 180 men with ED, 50 men with negative EST who had normal erectile function                               | (57, 54)            | FMD                                                                                                                                                                                                                                                                                                    | IIEF-5        |

Supplement Table 3. Continued 1

| First author | Publication year | Population                                                                                      | Age range (average) | Measures                                                                                                                                                                                                                                                                            | ED assessment                                                    |
|--------------|------------------|-------------------------------------------------------------------------------------------------|---------------------|-------------------------------------------------------------------------------------------------------------------------------------------------------------------------------------------------------------------------------------------------------------------------------------|------------------------------------------------------------------|
| Javaroni     | 2011             | 74 hypertensive patients with ED, 26 hypertensive patients without ED                           | 50–70 (58.9, 60.6)  | cIMT; FMD; NMD                                                                                                                                                                                                                                                                      | IIEF-15                                                          |
| Kaiser       | 2004             | 30 men with ED, 27 age-matched men without ED                                                   | (46.6, 46.2)        | cIMT; AoPWV; FMD; NMD                                                                                                                                                                                                                                                               | IIEF-15                                                          |
| Kakkavas     | 2013             | 43 hypertensive subjects with ED, 131 hypertensive persons without ED                           | (55.2, 48.8)        | CFPWV                                                                                                                                                                                                                                                                               | IIEF-5                                                           |
| Kaya         | 2006             | 32 men with ED, 25 age-matched men without ED                                                   | (55, 57)            | FMD; NMD                                                                                                                                                                                                                                                                            | IIEF-5                                                           |
| Kovac        | 2014             | 111 men with ED, 31 age-matched men without ED                                                  | (53.1, 46.8)        | AI                                                                                                                                                                                                                                                                                  | PSV $\leq$ 25 cm/s 15 min following injection of the vasodilator |
| Kumagai      | 2018             | 232 subjects with ED, 85 subjects without ED                                                    | (59)                | BAPWV; FAPWV                                                                                                                                                                                                                                                                        | IIEF-5                                                           |
| Kumagai      | 2020             | 185 subjects with ED, 68 subjects without ED                                                    | (60)                | AI                                                                                                                                                                                                                                                                                  | IIEF-5                                                           |
| Lahoz        | 2015             | 373 men with ED, 241 age-matched men without ED                                                 | (62.3, 59.9)        | cIMT; ABI                                                                                                                                                                                                                                                                           | IIEF-5                                                           |
| Lee          | 2015             | 208 Gout patients (51 had moderate to severe ED, 157 had none to mild ED)                       | (49.7, 40.8)        | ABI; BAPWV                                                                                                                                                                                                                                                                          | IIEF-5                                                           |
| Lojanapiwat  | 2009             | 41 patients with ED, 30 aged-matched persons without ED                                         | (55.4, 55.0)        | FMD                                                                                                                                                                                                                                                                                 | IIEF-5                                                           |
| Maiorino     | 2015             | 38 type 1 Caucasian diabetic patients with ED, 80 type 1 Caucasian diabetic patients without ED | (23.1, 23.4)        | EPCs(CD34 <sup>+</sup> ); EPCs(CD133 <sup>+</sup> ); EPCs(KDR <sup>+</sup> ); EPCs(CD34 <sup>+</sup> /CD133 <sup>+</sup> ); EPCs(CD34 <sup>+</sup> /KDR <sup>+</sup> ); EPCs(CD133 <sup>+</sup> /KDR <sup>+</sup> ); EPCs(CD34 <sup>+</sup> /CD133 <sup>+</sup> /KDR <sup>+</sup> ) | IIEF-5                                                           |
| Malpartida   | 2011             | 154 male diabetic patients (105 had ED, 49 had no ED)                                           | (57.7, 52.1)        | ABI                                                                                                                                                                                                                                                                                 | IIEF-15                                                          |
| Mazo         | 2006             | 135 patients with ED, 30 aged-matched persons without ED                                        | (51.0, 52.1)        | FMD                                                                                                                                                                                                                                                                                 | IIEF-15                                                          |
| Mulla        | 2021             | 25 men with ED, 25 age-matched men without ED                                                   | (61.20, 58.56)      | cIMT                                                                                                                                                                                                                                                                                | IIEF-5                                                           |
| Murata       | 2012             | 100 Type 2 diabetics patients (58 had ED, 42 had no ED)                                         | (64.3, 61.8)        | FMD; NMD; EPCs(CD34 <sup>+</sup> /CD133 <sup>+</sup> )                                                                                                                                                                                                                              | IIEF-5                                                           |
| Pelliccione  | 2012             | 35 men with ED, 10 men without ED                                                               | 25–70               | cIMT                                                                                                                                                                                                                                                                                | IIEF-5                                                           |
| Schipilliti  | 2011             | 115 ED patients without penile vasculopathy, 50 healthy men                                     | (49.4, 48.2)        | cIMT; IMT cavernous; Femoral IMT                                                                                                                                                                                                                                                    | IIEF-15                                                          |
| Severo       | 2014             | 114 type 2 diabetes mellitus and hypertension patients (82 had ED, 32 had no ED)                | (56.8, 56.7)        | ABI                                                                                                                                                                                                                                                                                 | IIEF-5                                                           |
| Simsek       | 2014             | 150 patients with ED, 50 aged-matched persons without ED                                        | (59.0, 58.7)        | FMD                                                                                                                                                                                                                                                                                 | IIEF-5                                                           |
| Stolic       | 2010             | 73 men treated with chronic hemodialysis for over 3 months (60 had ED, 13 had no ED)            | (55.06, 51.75)      | cIMT                                                                                                                                                                                                                                                                                | IIEF-15                                                          |
| Stuckey      | 2006             | 49 men with ED, 50 age-matched men without ED                                                   | 40–70 (59, 56)      | cIMT; FMD; NMD                                                                                                                                                                                                                                                                      | IIEF-15                                                          |
| Uslu         | 2005             | 30 men with ED, 25 age-matched men without ED                                                   | (53.9, 52.2)        | FMD; NMD                                                                                                                                                                                                                                                                            | IIEF-5                                                           |
| Vicenzini    | 2008             | 15 men with ED, 15 men without ED                                                               | (58, 59)            | cIMT                                                                                                                                                                                                                                                                                | IIEF-15                                                          |

Supplement Table 3. Continued 2

| First author | Publication year | Population                                                                                 | Age range (average) | Measures                                                                       | ED assessment |
|--------------|------------------|--------------------------------------------------------------------------------------------|---------------------|--------------------------------------------------------------------------------|---------------|
| Vignera      | 2011             | 50 consecutive patients with ED of arterial origin, 20 healthy men                         | (56, 58)            | IMT cavernous                                                                  | IIEF-5        |
| Vignera      | 2011             | 100 subjects with ED and Mets, 30 subjects without ED and Mets                             | (54.3, 52.7)        | EPC (CD45 <sup>+</sup> /CD34 <sup>+</sup> /CD144 <sup>+</sup> )                | IIEF-5        |
| Vignera      | 2011             | 20 subjects only with ED, 20 healthy subjects without ED and LOH                           | (61.2, 61.4)        | IMT cavernous; EPC (CD45 <sup>+</sup> /CD34 <sup>+</sup> /CD144 <sup>+</sup> ) | IIEF-5        |
| Vignera      | 2012             | 50 subjects with arterial ED and Mets, 20 subjects with Mets but without ED                | (55, 57)            | EPC (CD45 <sup>+</sup> /CD34 <sup>+</sup> /CD144 <sup>+</sup> )                | IIEF-5        |
| Vlachopoulos | 2008             | 52 hypertensive men with vasculogenic ED, 34 age-matched HT men without ED                 | (61.4, 59.0)        | cIMT; AI; CFPWV; FMD; NMD                                                      | IIEF-5        |
| Yao          | 2012             | 122 patients with ED, 33 age-matched men without ED                                        | (31.81, 29.82)      | cIMT; FMD                                                                      | IIEF-5        |
| Yao          | 2013             | 192 men with ED, 33 men without ED                                                         | (29.44, 29.82)      | cIMT; FMD                                                                      | IIEF-5        |
| Yavuzgil     | 2005             | 36 ED patients with cardiovascular risk, 39 no ED persons with similar cardiovascular risk | (54.4, 53.2)        | FMD; NMD                                                                       | IIEF-5        |
| Yuan         | 2020             | 264 diabetic patients (188 had ED, 76 had no ED)                                           | (49.85, 44.40)      | cIMT                                                                           | IIEF-5        |

ED: Erectile Dysfunction, cIMT: Carotid Intima–Media Thickness, IIEF: International Index of Erectile Function, FMD: Flow-Mediated Dilation, ABI: Ankle–Brachial Index, IMT: Intima–Media Thickness, NMD: Nitrate-Mediated Dilation, EPCs: Endothelial Progenitor Cells, HIV: Human Immunodeficiency Virus, EST: Exercise Stress Testing, AoPWV: Aortic Pulse Wave Velocity, CFPWV: Carotid-Femoral Pulse Wave Velocity, PSV: Peak Systolic Velocity, FAPWV: Femoral-Ankle Pulse Wave Velocity, HT: Hypertension.
