# Supplementary material for: Associations between Erectile Dysfunction and Vascular Parameters: A Systematic Review and Meta-Analysis
Source: PubMed Central journal article supplement — World J Mens Health. 2024 Jan 15;42(4):712–26. doi: 10.5534/wjmh.230192 (PMC11439810; doi:10.5534/wjmh.230192), 2024-01-15
Supplement: wjmh-42-712-s010.pdf [file wjmh-42-712-s010.pdf]

**Supplement Table 4.** The quality score of the studies included in this meta-analysis

| First author (year), and institution site | NOS score |
|-------------------------------------------|-----------|
| Arrabal-Polo (2014) España                | 6         |
| Al-Ali (2015) Graz, Austria               | 6         |
| Averbeck (2012) Porto Alegre, Brazil      | 6         |
| Baumhäkel (2006) Homburg/Saar, Germany    | 7         |
| Bhatia (2013) Lucknow, India              | 6         |
| Bocchio (2004) L'Aquila, Italy            | 6         |
| Bulbul (2022) Trabzon, Turkey             | 6         |
| Caretta (2009) Padova, Italy              | 7         |
| Caretta (2013) Padova, Italy              | 7         |
| Chen (2016) Guangzhou, China              | 6         |
| Chiurlia (2005) Modena, Italy             | 7         |
| Dženkevičiūtė (2013) Lithuania            | 7         |
| Elkamshoushi (2018) Alexandria            | 6         |
| Esposito (2007) Naples, Italy             | 6         |
| Esposito (2008) Naples, Italy             | 7         |
| Esposito (2009) Naples, Italy             | 7         |
| Foresta (2005) Padova, Italy              | 7         |
| Foresta (2006) Padova, Italy              | 7         |
| Foresta (2006) Padua, Italy               | 6         |
| Foresta (2009) Padova, Italy              | 6         |
| Gerber (2015) Massachusetts, England      | 6         |
| Guaraldi (2012) Modena, Italy             | 8         |
| Huang (2010) Guangzhou, China             | 5         |
| Imai (2009) Japan                         | 7         |
| Ioakeimidis (2016) Athens, Greece         | 8         |
| Javaroni (2011) Brazil                    | 7         |
| Kaiser (2004) USA                         | 6         |
| Kakkavas (2013) Athens, Greece            | 6         |
| Kaya (2006) Istanbul, Turkey              | 7         |
| Kovac (2014) USA                          | 6         |
| Kumagai (2018) Ibaraki, Japan             | 5         |
| Kumagai (2020) Chiba, Japan               | 5         |
| Lahoz (2015) Madrid, Spain                | 7         |
| Lee (2015) Busan, South Korea             | 6         |
| Lojanapiwat (2009) Chiang Mai Thailand    | 7         |
| Maiorino (2015) Naples, Italy             | 7         |
| Malpartida (2011) Valencia, Spain         | 5         |
| Mazo (2006) Moscow, Russia                | 6         |
| Mulla (2021) Alexandria, Egypt            | 7         |
| Murata (2012) Saitama Japan               | 7         |
| Pelliccione (2012) Aquila, Italy          | 5         |
| Schipilliti (2011) Padova, Italy          | 7         |
| Severo (2014) Porto Alegre, Brazil        | 8         |
| Simsek (2014) Istanbul, Turkey            | 7         |
| Stolic (2010) Serbia                      | 6         |
| Stuckey (2006) Nedlands, Australia        | 6         |

**Supplement Table 4.** Continued

| First author (year), and institution site | NOS score |
|-------------------------------------------|-----------|
| Uslu (2005) Istanbul, Turkey              | 6         |
| Vicenzini (2008) Rome, Italy              | 8         |
| Vignera (2011) Catania, Italy             | 6         |
| Vignera (2011) Catania, Italy             | 7         |
| Vignera (2011) Catania, Italy             | 6         |
| Vignera (2012) Catania, Italy             | 7         |
| Vlachopoulos (2008) Athens, Greece        | 8         |
| Yao (2012) Guangzhou, China               | 6         |
| Yao (2013) Guangzhou, China               | 7         |
| Yavuzgil (2005) Izmir, Turkey             | 7         |
| Yuan (2020) Wuhan, China                  | 6         |

NOS: Newcastle–Ottawa Scale.
